# Supplementary material for: Plasmablast, memory B cell and T follicular helper cell responses after human papillomavirus vaccination: effect of dose number and age
Source: Research Square preprint supplement (doi:10.21203/rs.3.rs-8157226/v1), 2025-11-20
Supplement: Supplementary file 1 [file 34cf33d10f9172d89ea74a05.docx]

Supplementary material

Plasmablast, memory B cell and T follicular helper cell responses after human papillomavirus vaccination: effect of dose number and age

**Authors:** Eunice W. Kiamba1,3*, Dolapo O. Ajiboye1,3, Adedapo Olufemi Bashorun1,3, Mamie Ndeban Jallow1, Lamin Drammeh5, Samba Bah1, Tijan Jobarteh1, Francis Kanu1, Ousubie Jawla1, Jobarteh Lamin1,3, Anne Segonds-Pichon1,3, Martin J Holland1,3, Martin R. Goodier1,4, Sophie Roetynck2,3, Ed Clarke1,3

**Affiliations:**

1Vaccines and Immunity Theme, MRC Unit The Gambia at London School of Hygiene and Tropical Medicine, P.O. Box 273, Banjul, The Gambia.

2Disease Control and Elimination Theme, MRC Unit The Gambia at London School of Hygiene and Tropical Medicine, P.O. Box 273, Banjul, The Gambia.

3Department of Clinical Research, London School of Hygiene and Tropical Medicine; Keppel Street, London WC1E 7HT, United Kingdom.

4Department of Infection Biology, London School of Hygiene and Tropical Medicine; Keppel Street, London WC1E 7HT, United Kingdom.

5Edward Francis Small Teaching Hospital, FC4C+WW4, Banjul, The Gambia.

*Corresponding author. Eunice.kiamba@lshtm.ac.uk

**Supplementary material**

**Fig. S1. Vaccination and blood sampling timepoints**

For the samples used in this study, females aged between 4 and 14 years received 2 vaccination doses (12 months interval) while those aged between 15 and 26 years received 3 doses (2, 10 months intervals). Blood samples were collected immediately before vaccination (day 0) and at either day 7 or 14 after vaccination, as shown at baseline and at 12 months post-dose 1. The day 7 samples were used to evaluate plasmablast and T follicular helper cell responses while day 14 samples were tested for memory B cell responses.

**Table S1. Number of HPV 16/HPV 18-specific IgG secreting cells per 106 PBMCs**

**A:** HPV 16pooled

|  | **All ages** | **4 to 26 years; n = 55** | | | |
| --- | --- | --- | --- | --- | --- |
|  | Sampling timepoint | Baseline | Post-dose 1 | Pre-dose 2/3 | Post-dose 2/3 |
| No. of IgG secreting cells per 106  PBMC | 25% Percentile | 0 | 1 | 0 | 157 |
| Median | 1 | 3 | 0 | 325 |
| 75% Percentile | 4 | 7 | 3 | 691 |

**B:** HPV 18pooled

|  | **All ages** | **4 to 26 years; n = 55** | | | |
| --- | --- | --- | --- | --- | --- |
|  | Sampling timepoint | Baseline | Post-dose 1 | Pre-dose 2/3 | Post-dose 2/3 |
| No. of IgG secreting cells per 106  PBMC | 25% Percentile | 0 | 1 | 0 | 60 |
| Median | 1 | 3 | 0 | 127 |
| 75% Percentile | 4 | 8 | 1 | 271 |

**C:** HPV 16 age-stratified

|  | **Age stratified** | **4 to 8 years; n = 20** | | | | **9 to 14 years; n = 19** | | | | **15 to 26 years; n = 16** | | | |
| --- | --- | --- | --- | --- | --- | --- | --- | --- | --- | --- | --- | --- | --- |
|  | Sampling timepoint | Baseline | Post-dose 1 | Pre-dose 2 | Post-dose 2 | Baseline | Post-dose 1 | Pre-dose 2 | Post-dose 2 | Baseline | Post-dose 1 | Pre-dose 3 | Post-dose 3 |
| No. of IgG secreting cells per 106  PBMC | 25% Percentile | 0 | 0 | 0 | 108 | 0 | 1 | 0 | 243 | 2 | 0 | 0 | 90 |
| Median | 0 | 2 | 0 | 310 | 3 | 3 | 1 | 432 | 5 | 2 | 0 | 165 |
| 75% Percentile | 1 | 6 | 3 | 636 | 4 | 4 | 3 | 827 | 5 | 61 | 3 | 361 |

**D:** HPV 18age-stratified

|  | **Age stratified** | **4 to 8 years; n = 17** | | | | **9 to 14 years; n = 20** | | | | **15 to 26 years; n = 18** | | | |
| --- | --- | --- | --- | --- | --- | --- | --- | --- | --- | --- | --- | --- | --- |
|  | Sampling timepoint | Baseline | Post-dose 1 | Pre-dose 2 | Post-dose 2 | Baseline | Post-dose 1 | Pre-dose 2 | Post-dose 2 | Baseline | Post-dose 1 | Pre-dose 3 | Post-dose 3 |
| No. of IgG secreting cells per 106  PBMC | 25% Percentile | 0 | 0 | 0 | 47 | 1 | 1 | 0 | 93 | 0 | 1 | 0 | 57 |
| Median | 0 | 1 | 0 | 128 | 3 | 3 | 1 | 159 | 3 | 3 | 0 | 91 |
| 75% Percentile | 1 | 8 | 1 | 347 | 4 | 7 | 1 | 292 | 5 | 11 | 1 | 160 |

**Table S2. Number of HPV 16/HPV 18 specific IgM secreting cells per 106 PBMCs**

**A:** HPV 16pooled

|  | **All ages** | **4 to 26 years; n = 55** | | | |
| --- | --- | --- | --- | --- | --- |
|  | Sampling timepoint | Baseline | Post-dose 1 | Pre-dose 2/3 | Post-dose 2/3 |
| No. of IgM secreting cells per 106  PBMC | 25% Percentile | 0 | 1 | 0 | 0 |
| Median | 1 | 3 | 0 | 1 |
| 75% Percentile | 1 | 5 | 0 | 3 |

**B:** HPV 18pooled

|  | **All ages** | **4 to 26 years; n = 55** | | | |
| --- | --- | --- | --- | --- | --- |
|  | Sampling timepoint | Baseline | Post-dose 1 | Pre-dose 2/3 | Post-dose 2/3 |
| No. of IgM secreting cells per 106  PBMC | 25% Percentile | 0 | 1 | 0 | 0 |
| Median | 0 | 1 | 0 | 0 |
| 75% Percentile | 1 | 4 | 1 | 1 |

**C:** HPV 16 age stratified

|  | **Age stratified** | **4 to 8 years; n = 17** | | | | **9 to 14 years; n = 20** | | | | **15 to 26 years; n = 18** | | | |
| --- | --- | --- | --- | --- | --- | --- | --- | --- | --- | --- | --- | --- | --- |
|  | Sampling timepoint | Baseline | Post-dose 1 | Pre-dose 2 | Post-dose 2 | Baseline | Post-dose 1 | Pre-dose 2 | Post-dose 2 | Baseline | Post-dose 1 | Pre-dose 3 | Post-dose 3 |
| No. of IgM secreting cells per 106  PBMC | 25% Percentile | 0 | 1 | 0 | 0 | 0 | 0 | 0 | 0 | 0 | 0 | 0 | 0 |
| Median | 1 | 4 | 0 | 1 | 0 | 1 | 0 | 1 | 1 | 2 | 0 | 0 |
| 75% Percentile | 3 | 10 | 1 | 3 | 1 | 3 | 0 | 4 | 2 | 5 | 0 | 1 |

**D:** HPV 18age-stratified

|  | **Age stratified** | **4 to 8 years; n = 17** | | | | **9 to 14 years; n = 20** | | | | **15 to 26 years; n = 18** | | | |
| --- | --- | --- | --- | --- | --- | --- | --- | --- | --- | --- | --- | --- | --- |
|  | Sampling timepoint | Baseline | Post-dose 1 | Pre-dose 2 | Post-dose 2 | Baseline | Post-dose 1 | Pre-dose 2 | Post-dose 2 | Baseline | Post-dose 1 | Pre-dose 3 | Post-dose 3 |
| No. of IgM secreting cells per 106  PBMC | 25% Percentile | 0 | 0 | 0 | 0 | 0 | 1 | 0 | 0 | 0 | 1 | 0 | 0 |
| Median | 0 | 1 | 0 | 0 | 0 | 3 | 0 | 0 | 1 | 2 | 0 | 0 |
| 75% Percentile | 1 | 2 | 1 | 1 | 1 | 4 | 1 | 3 | 2 | 4 | 1 | 1 |

**Table S3. Frequencies of HPV 16/18-specific IgG Bmem after Gardasil 9 vaccination**

**A:** HPV 16 pooled

|  | **All ages** | **4 to 26 years; n = 53** | | | |
| --- | --- | --- | --- | --- | --- |
|  | Sampling timepoint | Baseline | Post-dose 1 | Pre-dose 2/3 | Post-dose 2/3 |
| % in total IgG memory B cells | 25% Percentile | 0.02 | 0.02 | 0.06 | 0.30 |
| Median | 0.03 | 0.03 | 0.09 | 0.58 |
| 75% Percentile | 0.06 | 0.06 | 0.15 | 1.22 |

**B:** HPV 18 pooled

|  | **All ages** | **4 to 26 years; n = 53** | | | |
| --- | --- | --- | --- | --- | --- |
|  | Sampling timepoint | Baseline | Post-dose 1 | Pre-dose 2/3 | Post-dose 2/3 |
| % in total IgG memory B cells | 25% Percentile | 0.01 | 0.02 | 0.04 | 0.20 |
| Median | 0.03 | 0.03 | 0.07 | 0.34 |
| 75% Percentile | 0.05 | 0.05 | 0.13 | 0.75 |

**C:** HPV 16 age-stratified

|  | **Age stratified** | **4 to 8 years; n = 18** | | | | **9 to 14 years; n = 19** | | | | **15 to 26 years; n = 16** | | | |
| --- | --- | --- | --- | --- | --- | --- | --- | --- | --- | --- | --- | --- | --- |
|  | Sampling timepoint | Baseline | Post-dose 1 | Pre-dose 2 | Post-dose 2 | Baseline | Post-dose 1 | Pre-dose 2 | Post-dose 2 | Baseline | Post-dose 1 | Pre-dose 3 | Post-dose 3 |
| % in total IgG memory B cells | 25% Percentile | 0.02 | 0.02 | 0.09 | 0.39 | 0.03 | 0.02 | 0.04 | 0.30 | 0.01 | 0.02 | 0.05 | 0.21 |
| Median | 0.03 | 0.04 | 0.14 | 0.68 | 0.04 | 0.03 | 0.08 | 0.58 | 0.03 | 0.03 | 0.07 | 0.46 |
| 75% Percentile | 0.06 | 0.06 | 0.16 | 0.99 | 0.06 | 0.05 | 0.15 | 1.62 | 0.05 | 0.08 | 0.10 | 1.21 |

**D:** HPV 18 age-stratified

|  | **Age stratified** | **4 to 8 years; n = 18** | | | | **9 to 14 years; n = 19** | | | | **15 to 26 years; n = 16** | | | |
| --- | --- | --- | --- | --- | --- | --- | --- | --- | --- | --- | --- | --- | --- |
|  | Sampling timepoint | Baseline | Post-dose 1 | Pre-dose 2 | Post-dose 2 | Baseline | Post-dose 1 | Pre-dose 2 | Post-dose 2 | Baseline | Post-dose 1 | Pre-dose 3 | Post-dose 3 |
| % in total IgG memory B cells | 25% Percentile | 0.02 | 0.02 | 0.06 | 0.27 | 0.03 | 0.02 | 0.04 | 0.21 | 0.01 | 0.01 | 0.03 | 0.14 |
| Median | 0.03 | 0.04 | 0.10 | 0.34 | 0.04 | 0.02 | 0.07 | 0.57 | 0.02 | 0.03 | 0.05 | 0.20 |
| 75% Percentile | 0.05 | 0.07 | 0.16 | 0.53 | 0.06 | 0.04 | 0.10 | 0.86 | 0.04 | 0.08 | 0.07 | 0.57 |

**Table S4. Frequencies of ex vivo activated Tfh cells following Gardasil 9 vaccination**

**A**: Total Tfh pooled

|  | **All ages** | **4 to 26 years** | | | |
| --- | --- | --- | --- | --- | --- |
|  |  | **n = 44** | **n = 44** | **n = 51** | **n = 51** |
|  | Sampling timepoint | Baseline | Post-dose 1 | Pre-dose 2/3 | Post-dose 2/3 |
| % ICOS+PD-1++  in total Tfh cells | 25% Percentile | 0.69 | 0.80 | 0.88 | 1.44 |
| Median | 1.18 | 1.41 | 1.36 | 2.25 |
| 75% Percentile | 1.83 | 2.27 | 1.91 | 3.78 |

**B**: Tfh1 pooled

|  | **All ages** | **4 to 26 years** | | | |
| --- | --- | --- | --- | --- | --- |
|  | **n = 44** | **n = 44** | **n = 51** | **n = 51** |
|  | Sampling timepoint | Baseline | Post-dose 1 | Pre-dose 2/3 | Post-dose 2/3 |
| % ICOS+PD-1++  in Tfh1 cells | 25% Percentile | 0.73 | 1.02 | 0.98 | 1.96 |
| Median | 1.24 | 1.59 | 1.50 | 3.40 |
| 75% Percentile | 2.37 | 2.89 | 3.28 | 4.72 |

**C**: Tfh2 pooled

|  | **All ages** | **4 to 26 years** | | | |
| --- | --- | --- | --- | --- | --- |
|  |  | **n = 44** | **n = 44** | **n = 51** | **n = 51** |
|  | Sampling timepoint | Baseline | Post-dose 1 | Pre-dose 2/3 | Post-dose 2/3 |
| % ICOS+PD-1++  in Tfh2 cells | 25% Percentile | 0.65 | 0.82 | 0.77 | 1.64 |
| Median | 1.16 | 1.58 | 1.18 | 2.18 |
| 75% Percentile | 1.79 | 2.45 | 1.89 | 3.51 |

**D**: Tfh17 pooled

|  | **All ages** | **4 to 26 years** | | | |
| --- | --- | --- | --- | --- | --- |
|  |  | **n = 44** | **n = 44** | **n = 51** | **n = 51** |
|  | Sampling timepoint | Baseline | Post-dose 1 | Pre-dose 2/3 | Post-dose 2/3 |
| % ICOS+PD-1++  in Tfh17 cells | 25% Percentile | 0.53 | 0.47 | 0.72 | 0.63 |
| Median | 0.86 | 1.09 | 1.21 | 1.29 |
| 75% Percentile | 1.79 | 1.71 | 1.52 | 2.27 |

**E**: Total Tfh age-stratified

|  | **Age stratified** | **4 to 8 years; n = 18** | | | | **9 to 14 years; n = 19** | | | | **15 to 26 years; n = 16** | | | |
| --- | --- | --- | --- | --- | --- | --- | --- | --- | --- | --- | --- | --- | --- |
|  |  | **n = 20** | **n = 20** | **n = 19** | **n = 19** | **n = 16** | **n = 16** | **n = 16** | **n = 16** | **n = 8** | **n = 8** | **n = 16** | **n = 16** |
|  | Sampling timepoint | Baseline | Post-dose 1 | Pre-dose 2 | Post-dose 2 | Baseline | Post-dose 1 | Pre-dose 2 | Post-dose 2 | Baseline | Post-dose 1 | Pre-dose 3 | Post-dose 3 |
| %  ICOS+PD-1++  in total Tfh cells | 25% Percentile | 1.18 | 1.62 | 1.39 | 2.15 | 0.71 | 0.65 | 0.92 | 2.03 | 0.16 | 0.19 | 0.66 | 0.95 |
| Median | 1.66 | 2.24 | 1.91 | 3.23 | 1.17 | 0.99 | 1.56 | 3.27 | 0.68 | 0.65 | 0.90 | 1.41 |
| 75% Percentile | 2.13 | 2.81 | 2.61 | 3.87 | 1.36 | 1.54 | 1.80 | 4.17 | 0.95 | 1.04 | 1.07 | 1.68 |

Continued next page

**F**: Tfh1 age-stratified

|  | **Age stratified** | **4 to 8 years; n = 18** | | | | **9 to 14 years; n = 19** | | | | **15 to 26 years; n = 16** | | | |
| --- | --- | --- | --- | --- | --- | --- | --- | --- | --- | --- | --- | --- | --- |
|  |  | **n = 20** | **n = 20** | **n = 19** | **n = 19** | **n = 16** | **n = 16** | **n = 16** | **n = 16** | **n = 8** | **n = 8** | **n = 16** | **n = 16** |
|  | Sampling timepoint | Baseline | Post-dose 1 | Pre-dose 2 | Post-dose 2 | Baseline | Post-dose 1 | Pre-dose 2 | Post-dose 2 | Baseline | Post-dose 1 | Pre-dose 3 | Post-dose 3 |
| %  ICOS+PD-1++  in Tfh1 cells | 25% Percentile | 1.23 | 1.59 | 1.50 | 2.48 | 0.66 | 0.56 | 1.09 | 3.58 | 0 | 0.06 | 0.66 | 1.33 |
| Median | 2.12 | 2.72 | 2.11 | 3.40 | 1.14 | 1.17 | 1.85 | 4.61 | 0.67 | 0.81 | 0.96 | 2.07 |
| 75% Percentile | 3.27 | 4.14 | 3.43 | 4.29 | 2.21 | 1.69 | 3.58 | 6.15 | 0.80 | 1.39 | 1.34 | 3.24 |

**G**: Tfh2 age-stratified

|  | **Age stratified** | **4 to 8 years; n = 18** | | | | **9 to 14 years; n = 19** | | | | **15 to 26 years; n = 16** | | | |
| --- | --- | --- | --- | --- | --- | --- | --- | --- | --- | --- | --- | --- | --- |
|  |  | **n = 20** | **n = 20** | **n = 19** | **n = 19** | **n = 16** | **n = 16** | **n = 16** | **n = 16** | **n = 8** | **n = 8** | **n = 16** | **n = 16** |
|  | Sampling timepoint | Baseline | Post-dose 1 | Pre-dose 2 | Post-dose 2 | Baseline | Post-dose 1 | Pre-dose 2 | Post-dose 2 | Baseline | Post-dose 1 | Pre-dose 3 | Post-dose 3 |
| %  ICOS+PD-1++  in Tfh2 cells | 25% Percentile | 1.06 | 1.67 | 0.84 | 2.13 | 0.77 | 0.81 | 0.77 | 1.80 | 0.31 | 0.33 | 0.44 | 0.90 |
| Median | 1.54 | 2.50 | 1.51 | 2.91 | 0.98 | 1.12 | 1.15 | 2.83 | 0.60 | 0.77 | 0.82 | 1.44 |
| 75% Percentile | 2.69 | 3.12 | 2.38 | 3.93 | 1.48 | 1.60 | 1.91 | 3.99 | 1.023 | 1.64 | 1.18 | 2.03 |

**H**: Tfh17 age-stratified

|  | **Age stratified** | **4 to 8 years; n = 18** | | | | **9 to 14 years; n = 19** | | | | **15 to 26 years; n = 16** | | | |
| --- | --- | --- | --- | --- | --- | --- | --- | --- | --- | --- | --- | --- | --- |
|  |  | **n = 20** | **n = 20** | **n = 19** | **n = 19** | **n = 16** | **n = 16** | **n = 16** | **n = 16** | **n = 8** | **n = 8** | **n = 16** | **n = 16** |
|  | Sampling timepoint | Baseline | Post-dose 1 | Pre-dose 2 | Post-dose 2 | Baseline | Post-dose 1 | Pre-dose 2 | Post-dose 2 | Baseline | Post-dose 1 | Pre-dose 3 | Post-dose 3 |
| %  ICOS+PD-1++  in Tfh17 cells | 25% Percentile | 0.79 | 0.82 | 1.09 | 1.17 | 0.00 | 0.40 | 0.72 | 0.59 | 0.08 | 0.10 | 0.51 | 0.39 |
| Median | 1.19 | 1.49 | 1.35 | 2.15 | 0.55 | 0.75 | 1.25 | 1.87 | 0.62 | 0.50 | 0.83 | 0.67 |
| 75% Percentile | 2.44 | 1.76 | 2.19 | 2.93 | 1.57 | 1.95 | 1.5 | 2.82 | 0.98 | 1.00 | 1.18 | 1.43 |

**Table S5. Frequencies of activated HPV 16 specific Tfh cells after Gardasil 9 vaccination**

**A**: OX40+CD25+ pooled

|  | **All ages** | **4 to 26 years** | | | |
| --- | --- | --- | --- | --- | --- |
|  |  | **n = 40** | **n = 40** | **n = 41** | **n = 41** |
|  | Sampling timepoint | Baseline | Post-dose 1 | Pre-dose 2/3 | Post-dose 2/3 |
| % OX40+CD25+  in total Tfh cells | 25% Percentile | 0.00 | 0.00 | 0.10 | 0.14 |
| Median | 0.03 | 0.10 | 0.48 | 0.38 |
| 75% Percentile | 0.14 | 0.40 | 1.27 | 1.45 |

**B**: OX40+PD-L1+ pooled

|  | **All ages** | **4 to 26 years** | | | |
| --- | --- | --- | --- | --- | --- |
|  |  | **n = 40** | **n = 40** | **n = 41** | **n = 41** |
|  | Sampling timepoint | Baseline | Post-dose 1 | Pre-dose 2/3 | Post-dose 2/3 |
| %  OX40+PD-L1+  in total Tfh cells | 25% Percentile | 0.00 | 0.00 | 0.05 | 0.08 |
| Median | 0.00 | 0.04 | 0.51 | 0.42 |
| 75% Percentile | 0.08 | 0.13 | 2.28 | 1.70 |

**C**: PD-L1+CD25+ pooled

|  | **All ages** | **4 to 26 years** | | | |
| --- | --- | --- | --- | --- | --- |
|  |  | **n = 40** | **n = 40** | **n = 41** | **n = 41** |
|  | Sampling timepoint | Baseline | Post-dose 1 | Pre-dose 2/3 | Post-dose 2/3 |
| %  PD-L1+CD25+  in total Tfh cells | 25% Percentile | 0.00 | 0.02 | 0.12 | 0.24 |
| Median | 0.12 | 0.29 | 0.45 | 0.81 |
| 75% Percentile | 0.47 | 1.03 | 1.97 | 2.34 |

**D**: OX40+CD25+ age-stratified

|  | **Age stratified** | **4 to 8 years; n = 18** | | | | **9 to 14 years; n = 19** | | | | | **15 to 26 years; n = 16** | | | |
| --- | --- | --- | --- | --- | --- | --- | --- | --- | --- | --- | --- | --- | --- | --- |
|  |  | **n = 15** | **n = 15** | **n = 15** | **n = 15** | **n = 12** | **n = 12** | **n = 12** | **n = 12** | **n = 13** | | **n = 13** | **n = 14** | **n = 14** |
|  | Sampling timepoint | Baseline | Post-dose 1 | Pre-dose 2 | Post-dose 2 | Baseline | Post-dose 1 | Pre-dose 2 | Post-dose 2 | Baseline | | Post-dose 1 | Pre-dose 3 | Post-dose 3 |
| % OX40+CD25+  in total Tfh cells | 25% Percentile | 0.00 | 0.02 | 0.05 | 0.10 | 0.00 | 0.00 | 0.18 | 0.21 | 0.03 | | 0.00 | 0.21 | 0.21 |
| Median | 0.00 | 0.07 | 0.16 | 0.17 | 0.01 | 0.13 | 0.76 | 0.52 | 0.12 | | 0.15 | 0.77 | 0.78 |
| 75% Percentile | 0.06 | 0.32 | 0.67 | 0.52 | 0.13 | 0.63 | 3.54 | 1.57 | 0.66 | | 0.52 | 2.21 | 1.85 |

Continued next page

**E**: OX40+PD-L1+ age-stratified

|  | **Age stratified** | **4 to 8 years; n = 18** | | | | **9 to 14 years; n = 19** | | | | **15 to 26 years; n = 16** | | | |
| --- | --- | --- | --- | --- | --- | --- | --- | --- | --- | --- | --- | --- | --- |
|  |  | **n = 15** | **n = 15** | **n = 15** | **n = 15** | **n = 12** | **n = 12** | **n = 12** | **n = 12** | **n = 13** | **n = 13** | **n = 14** | **n = 14** |
|  | Sampling timepoint | Baseline | Post-dose 1 | Pre-dose 2 | Post-dose 2 | Baseline | Post-dose 1 | Pre-dose 2 | Post-dose 2 | Baseline | Post-dose 1 | Pre-dose 3 | Post-dose 3 |
| % OX40+PD-L1+  in total Tfh cells | 25% Percentile | 0.00 | 0.00 | 0.00 | 0.00 | 0.00 | 0.01 | 0.06 | 0.04 | 0.00 | 0.01 | 0.12 | 0.30 |
| Median | 0.00 | 0.00 | 0.07 | 0.23 | 0.00 | 0.07 | 1.10 | 1.27 | 0.05 | 0.11 | 1.39 | 1.12 |
| 75% Percentile | 0.05 | 0.05 | 0.51 | 0.53 | 0.04 | 0.18 | 4.31 | 1.98 | 0.51 | 0.37 | 3.95 | 1.97 |

**F**: PD-L1+CD25+ age-stratified

|  | **Age stratified** | **4 to 8 years; n = 18** | | | | **9 to 14 years; n = 19** | | | | **15 to 26 years; n = 16** | | | |
| --- | --- | --- | --- | --- | --- | --- | --- | --- | --- | --- | --- | --- | --- |
|  |  | **n = 15** | **n = 15** | **n = 15** | **n = 15** | **n = 12** | **n = 12** | **n = 12** | **n = 12** | **n = 13** | **n = 13** | **n = 14** | **n = 14** |
|  | Sampling timepoint | Baseline | Post-dose 1 | Pre-dose 2 | Post-dose 2 | Baseline | Post-dose 1 | Pre-dose 2 | Post-dose 2 | Baseline | Post-dose 1 | Pre-dose 3 | Post-dose 3 |
| % PD-L1+CD25+  in total Tfh cells | 25% Percentile | 0.00 | 0.00 | 0.00 | 0.09 | 0.05 | 0.13 | 0.04 | 0.78 | 0.00 | 0.17 | 0.40 | 0.41 |
| Median | 0.00 | 0.21 | 0.15 | 0.27 | 0.22 | 0.34 | 0.90 | 1.65 | 0.15 | 0.30 | 1.51 | 1.59 |
| 75% Percentile | 0.23 | 0.41 | 0.35 | 0.81 | 0.64 | 1.23 | 5.26 | 4.21 | 1.11 | 1.12 | 3.53 | 4.64 |

**Table S6. Frequencies of activated HPV 18 specific Tfh cells after Gardasil 9 vaccination**

**A**: OX40+CD25+ pooled

|  | **All ages** | **4 to 26 years** | | | |
| --- | --- | --- | --- | --- | --- |
|  |  | **n = 39** | **n = 39** | **n = 40** | **n = 40** |
|  | Sampling timepoint | Baseline | Post-dose  1 | Pre-dose  2/3 | Post-dose 2/3 |
| % OX40+CD25+  in total Tfh cells | 25% Percentile | 0.00 | 0.07 | 0.00 | 0.02 |
| Median | 0.08 | 0.15 | 0.42 | 0.34 |
| 75% Percentile | 0.22 | 0.89 | 0.89 | 1.30 |

**B**: OX40+PD-L1+ pooled

|  | **All ages** | **4 to 26 years** | | | |
| --- | --- | --- | --- | --- | --- |
|  |  | **n = 40** | **n = 40** | **n = 41** | **n = 41** |
|  | Sampling timepoint | Baseline | Post-dose 1 | Pre-dose 2/3 | Post-dose  2/3 |
| % OX40+PD-L1+  in total Tfh cells | 25% Percentile | 0.00 | 0.00 | 0.05 | 0.12 |
| Median | 0.04 | 0.14 | 0.42 | 0.53 |
| 75% Percentile | 0.09 | 0.33 | 1.84 | 1.71 |

**C**: PD-L1+CD25+ pooled

|  | **All ages** | **4 to 26 years** | | | |
| --- | --- | --- | --- | --- | --- |
|  |  | **n = 39** | **n = 39** | **n = 40** | **n = 40** |
|  | Sampling timepoint | Baseline | Post-dose 1 | Pre-dose 2/3 | Post-dose  2/3 |
| % PD-L1+CD25+  in total Tfh cells | 25% Percentile | 0.00 | 0.19 | 0.02 | 0.34 |
| Median | 0.05 | 0.47 | 0.35 | 1.09 |
| 75% Percentile | 0.47 | 1.67 | 1.04 | 3.93 |

**D**: OX40+CD25+ age-stratified

|  | **Age stratified** | **4 to 8 years; n = 18** | | | | **9 to 14 years; n = 19** | | | | | **15 to 26 years; n = 16** | | | |
| --- | --- | --- | --- | --- | --- | --- | --- | --- | --- | --- | --- | --- | --- | --- |
|  |  | **n = 15** | **n = 15** | **n = 15** | **n = 15** | **n = 12** | **n = 12** | **n = 12** | **n = 12** | **n = 12** | | **n = 12** | **n = 13** | **n = 13** |
|  | Sampling timepoint | Baseline | Post-dose 1 | Pre-  dose 2 | Post-dose 2 | Baseline | Post-dose 1 | Pre-dose 2 | Post-dose 2 | Baseline | | Post-dose 1 | Pre-dose 3 | Post-dose 3 |
| % OX40+CD25+  in total Tfh cells | 25% Percentile | 0.00 | 0.00 | 0.00 | 0.00 | 0.00 | 0.08 | 0.00 | 0.05 | 0.00 | | 0.08 | 0.00 | 0.11 |
| Median | 0.08 | 0.08 | 0.22 | 0.19 | 0.06 | 0.15 | 0.70 | 0.69 | 0.06 | | 0.15 | 0.74 | 0.43 |
| 75% Percentile | 0.27 | 0.98 | 0.47 | 1.16 | 0.22 | 0.81 | 1.19 | 1.75 | 0.22 | | 0.81 | 1.63 | 1.61 |

Continued next page

**E**: OX40+PD-L1+ age-stratified

|  | **Age stratified** | **4 to 8 years; n = 18** | | | | **9 to 14 years; n = 19** | | | | **15 to 26 years; n = 16** | | | |
| --- | --- | --- | --- | --- | --- | --- | --- | --- | --- | --- | --- | --- | --- |
|  |  | **n = 15** | **n = 15** | **n = 15** | **n = 15** | **n = 12** | **n = 12** | **n = 12** | **n = 12** | **n = 12** | **n = 12** | **n = 14** | **n = 14** |
|  | Sampling timepoint | Baseline | Post-dose 1 | Pre-dose 2 | Post-dose 2 | Baseline | Post-dose 1 | Pre-dose 2 | Post-dose 2 | Baseline | Post-dose 1 | Pre-dose 3 | Post-dose 3 |
| %  OX40+PD-L1+  in total Tfh cells | 25% Percentile | 0.00 | 0.00 | 0.01 | 0.07 | 0.00 | 0.05 | 0.00 | 0.12 | 0.00 | 0.00 | 0.24 | 0.19 |
| Median | 0.00 | 0.00 | 0.20 | 0.23 | 0.05 | 0.16 | 0.70 | 1.17 | 0.04 | 0.29 | 1.48 | 0.60 |
| 75% Percentile | 0.09 | 0.18 | 0.42 | 1.12 | 0.10 | 0.62 | 1.80 | 1.99 | 0.18 | 0.40 | 4.36 | 1.86 |

**F**: PD-L1+CD25+ age-stratified

|  | **Age stratified** | **4 to 8 years; n = 18** | | | | **9 to 14 years; n = 19** | | | | **15 to 26 years; n = 16** | | | |
| --- | --- | --- | --- | --- | --- | --- | --- | --- | --- | --- | --- | --- | --- |
|  |  | **n = 15** | **n = 15** | **n = 15** | **n = 15** | **n = 12** | **n = 12** | **n = 12** | **n = 12** | **n = 12** | **n = 12** | **n = 13** | **n = 13** |
|  | Sampling timepoint | Baseline | Post-dose 1 | Pre-dose 2 | Post-dose 2 | Baseline | Post-dose 1 | Pre-dose 2 | Post-dose 2 | Baseline | Post-dose 1 | Pre-dose 3 | Post-dose 3 |
| % PD-L1+CD25+  in total Tfh cells | 25% Percentile | 0.00 | 0.05 | 0.00 | 0.07 | 0.01 | 0.32 | 0.11 | 0.38 | 0.01 | 0.32 | 0.15 | 0.40 |
| Median | 0.00 | 0.34 | 0.11 | 0.39 | 0.09 | 0.60 | 0.86 | 1.63 | 0.09 | 0.60 | 0.86 | 1.26 |
| 75% Percentile | 0.50 | 1.73 | 0.34 | 1.52 | 0.45 | 1.49 | 1.67 | 4.47 | 0.45 | 1.49 | 1.74 | 4.33 |

**Table S7. Tfh ex vivo antibody panel**

| **Antibody** | **Clone** | **Isotype** | **Company** | **Catalogue number** |
| --- | --- | --- | --- | --- |
| AlexaFluor (AF) 700 mouse anti-human CD4 | RPA-T4 | mIgG1 | BioLegend | 300526 |
| PECy7 anti-human/mouse/rat CD278 (ICOS) | C398.4A | Armenian hamster IgG | BioLegend | 313520 |
| PE mouse anti-human CD279 (PD-1), eBioscience | eBioJ105 | mIgG1 | Thermo Fisher Scientific | 12-2799-42 |
| PerCPCy5.5 mouse anti-human CXCR5 | J252D4 | mIgG1 | BioLegend | 356910 |
| APC/Cyanine7 anti-human CD183 (CXCR3) | G025H7 | mIgG1 | BioLegend | 353722 |
| Brilliant Violet (BV) 605 mouse anti-human CD45RO | UCHL1 | mIgG1 | BioLegend | 304238 |
| BV421 mouse anti-human CCR6 (CD196) | 11A9 | mIgG1 | BD Biosciences | 562515 |
| V500 Zombie Aqua™ Fixable Viability dye | - | - | BioLegend | 423102 |

**Table S8. Tfh AIM antibody panel**

| **Antibody** | **Clone** | **Isotype** | **Company** | **Catalogue number** |
| --- | --- | --- | --- | --- |
| Brilliant Violet (BV) 650 Mouse Anti-Human CD134 (OX40) | Ber-ACT35 (ACT35) | mIgG1 | BD Biosciences | 563658 |
| BV786 mouse anti-human CD25 | M-A251 | mIgG1 | BD Biosciences | 563701 |
| AlexaFluor (AF) 700 mouse anti-human CD4 | RPA-T4 | mIgG1 | BioLegend | 300526 |
| PerCPCy5.5 mouse anti-human CXCR5 | J252D4 | mIgG1 | BioLegend | 356910 |
| PE mouse anti-human CD274 (B7-H1, PD-L1) | 29E.2A3 | mIgG2b | BioLegend | 329706 |
| PECy7 mouse anti-human CD278 (ICOS) | C398.4A | Armenian hamster IgG | BioLegend | 313520 |
| BV605 mouse anti-human CD45RO | UCHL1 | mIgG1 | BioLegend | 304238 |
| PE-CF594 mouse anti-human FoxP3 | 236A/E7 | mIgG1 | BD Biosciences | 563955 |
| V500 mouse anti-human CD14 | M5E2 | mIgG2a | BD Biosciences | 561391 |
| V500 Zombie Aqua™ Fixable Viability dye | - | - | BioLegend | 423102 |
